# Supplementary material for: Structural Analyses of Apricot Pectin Polysaccharides by NMR Spectroscopy
Source: Preprints.org preprint supplement (doi:10.20944/preprints202312.0151.v1), 2023-12-04
Supplement: Supplementary file 1 [file supplementary]

## Supplementary Materials:

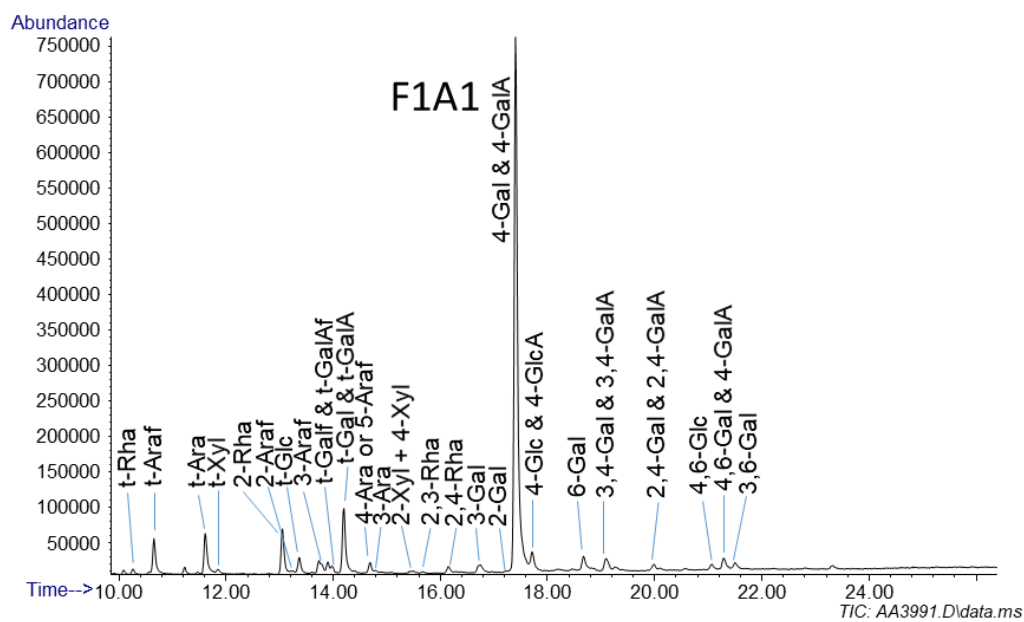

Figure S1: TIC chromatogram of the PMAA derivatives made from the F1AP sample;

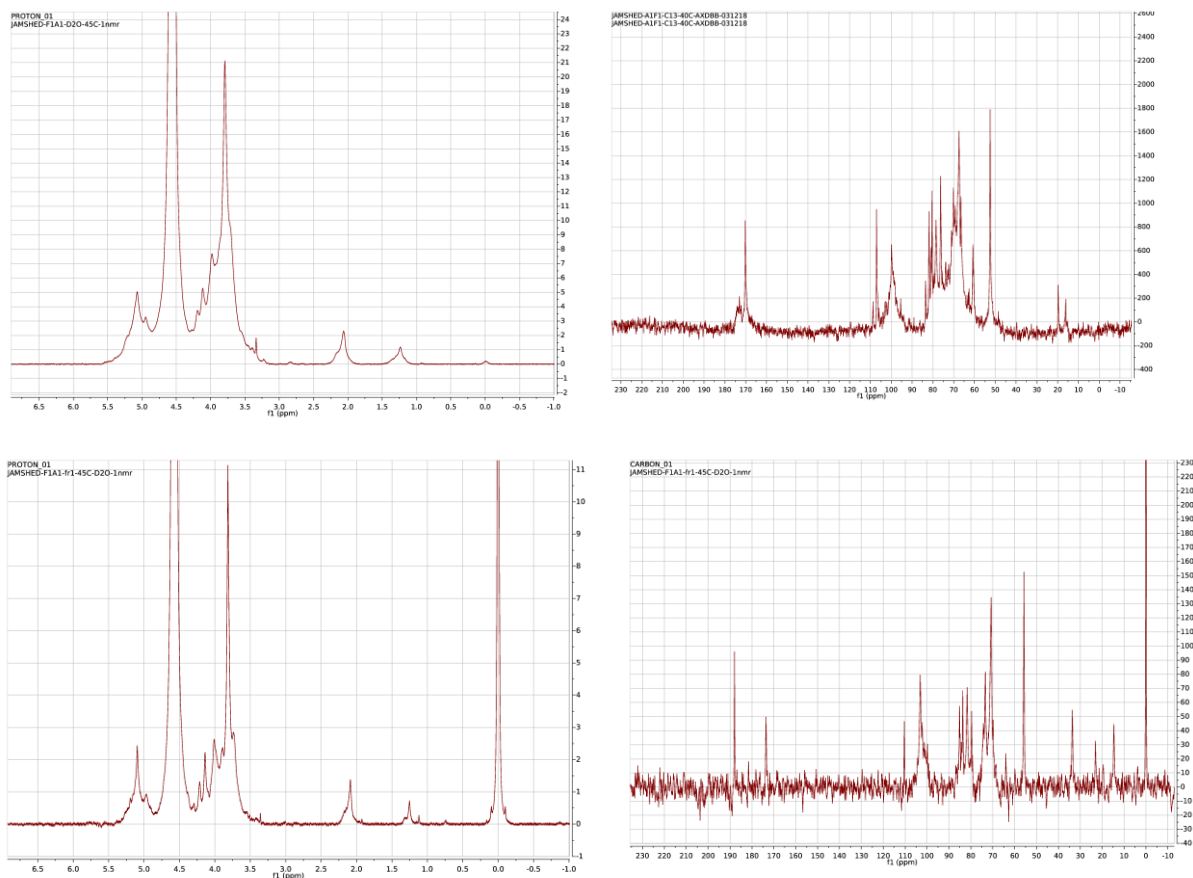

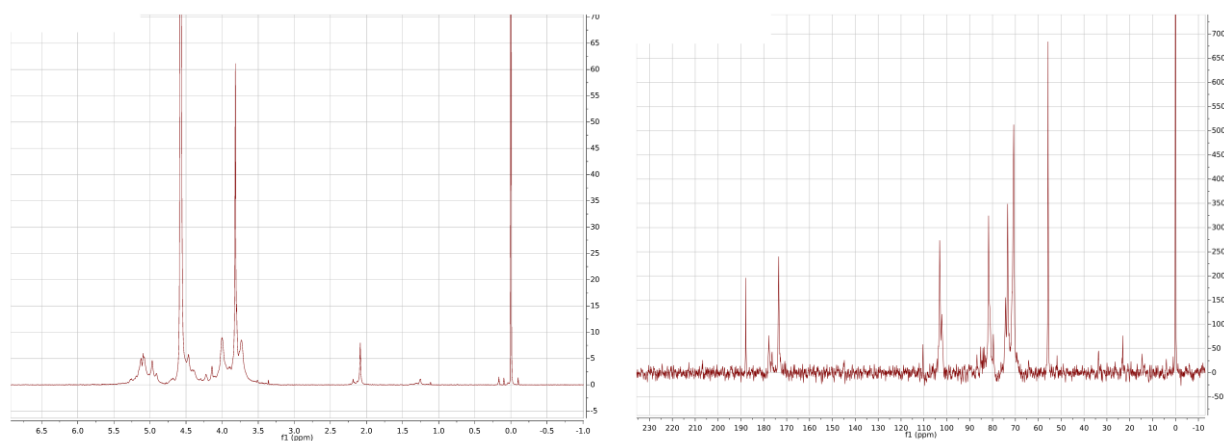

Figure S2:  $^1\text{H}$  and  $^{13}\text{C}$  NMR spectra: (a) F1AP; (b) F1AP1; (c) F1AP6

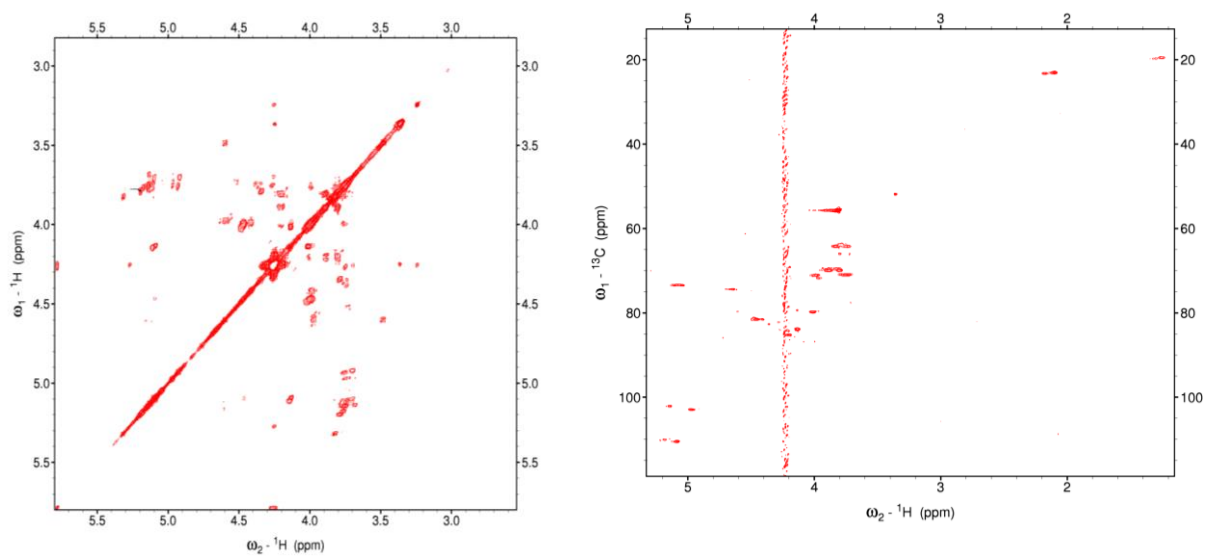

Figure S3: gCOSY (a) and Multiplicity-sensitive gHSQCAD spectrum of F1AP1 fraction at 80 °C;

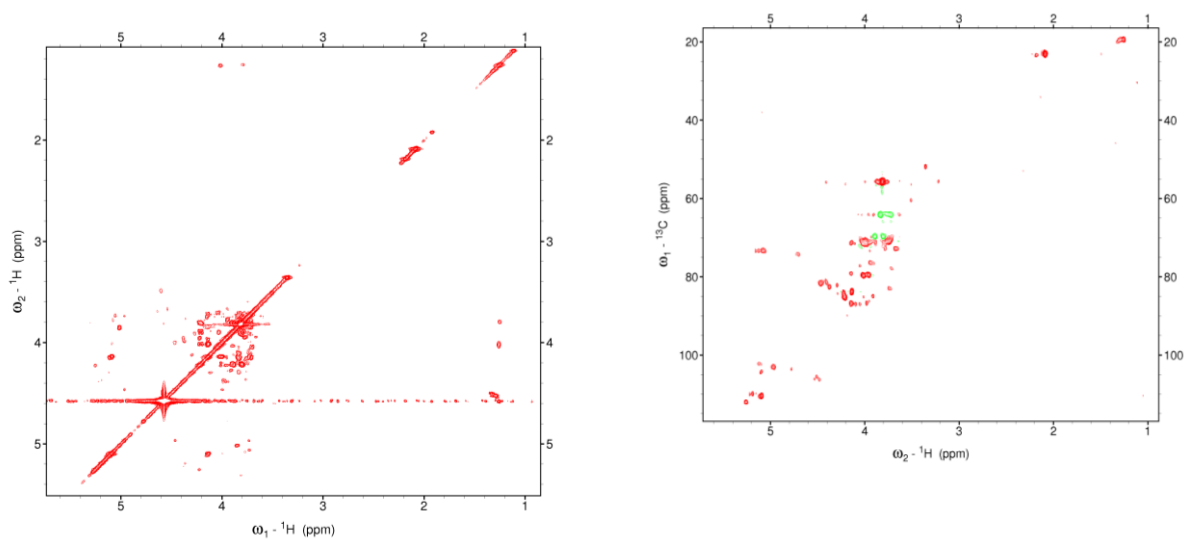

Figure S4: gCOSY and Multiplicity-sensitive gHSQCAD spectrum of F1AP6 fraction at 45 °C (green are CH<sub>2</sub>, red is CH and CH<sub>3</sub>).
